# Supplementary material for: HBx promotes hepatocellular carcinoma progression by repressing the transcription level of miR-187-5p
Source: publisher site journal article supplement (doi:10.18632/aging.204921), 2023-08-01
Supplement: Supplementary file [file aging-v15i15-204921-supplementary-material-SD2.pdf]

## SUPPLEMENTARY TABLES

**Supplementary Table 1. Details of plasmid construction primer sequences.**

| Gene name             | Primer sequences (5'–3')                   |
|-----------------------|--------------------------------------------|
| E2F1(F)               | CATCCCAGGAGGTCACCTCTG                      |
| E2F1(R)               | GACAACAGCGGTTCTTGCTC                       |
| FoxP3(F)              | ATGCCCAACCCCAGGCCTGGCAA                    |
| FoxP3(R)              | TCAGGGGCCAGGTGTAGGGTTGGA                   |
| WT-pmirGLO-CDH2(F)    | TGTTTTAAACGAGCTCGCTAGCACTTCAGGGTGAACCTGGT  |
| WT-pmirGLO-CDH2(R)    | GACTCTAGACTCGAGGCTAGCCCAGATCCAAAATTAGCA    |
| MUT-pmirGLO-CDH2(F)   | CACCAATTTGGCACAAAATTGAATTTTTTCATAAAC       |
| MUT-pmirGLO-CDH2(R)   | TTTGTGCCAAATTGGTGATATGAAAACCTCCCT          |
| WT-pGL3-miR-187-5p(F) | CGAGCTCTTACGCGTGCTAGCTCCCTCCCTCTAAATTGTTC  |
| WT-pGL3-miR-187-5p(R) | AGATCTCGAGCCCCGGGCTAGCTGCGGACCTGCGTCCCT    |
| MUT miR-187-5p(F1)    | AAGAAACCATCCGTAAGTAATAAATCCTTCAGAGGCC      |
| MUT miR-187-5p(R1)    | GGCTGCAGACAAGCCACTACAAGCCACTAATTACAGTTTA   |
| MUT miR-187-5p(F2)    | ATTACTTATGGCTGGTTTCTTTTTATTCAA             |
| MUT miR-187-5p(R1)    | AGTGGCTTGTCTGCAGCCATAATTCATTGTTTAAAGGA     |
| WT-pGL3-FoxP3(F)      | CGAGCTCTTACGCGTGCTAGC CAGCCCCCTTGTAGACCTGA |
| WT-pGL3-FoxP3(R)      | AGATCTCGAGCCCCGGGCTAGCGGCTTGGTGAAGTGGACTGA |

**Supplementary Table 2. Details of qRT-PCR primer sequence.**

| Gene name         | Primer sequences (5'–3')  |
|-------------------|---------------------------|
| E2F1(F)           | GTGGCCCGGATGTGAGAAG       |
| E2F1(R)           | GGAGCCCTTGTCGGATGATG      |
| FoxP3(F)          | GTGGCCCGGATGTGAGAAG       |
| FoxP3(R)          | GGAGCCCTTGTCGGATGATG      |
| CDH2(F)           | TGCGGTACAGTGTAACCTGGG     |
| CDH2(R)           | GAAACCGGGCTATCTGCTCG      |
| HBx-flag(F)       | ATGGCTGCTAGGCTGTGCT       |
| HBx-flag(R)       | TTAGGCAGAGGTGAAAAAGTTG    |
| GAPDH(F)          | CTTTGGTATCGTGGAAGGACTC    |
| GAPDH(R)          | GTAGAGGCAGGGATGATGTTCT    |
| U6(F)             | CAGCACATATACTAAAATTGGAACG |
| U6(R)             | ACGAATTTGCGTGTTCATCC      |
| hsa-miR-187-5p(F) | TCTGTCTTGTGTTGCAGC        |
| hsa-miR-187-5p(R) | GTGCAGGGTCCGAGGT          |
